# Supplementary material for: BMS1 Is Mutated in Aplasia Cutis Congenita
Source: PubMed Central journal article supplement (PMC3681727; doi:10.1371/journal.pgen.1003573), 2013-06-13
Supplement: pgen.1003573.s001.pdf [file pgen.1003573.s001.pdf]

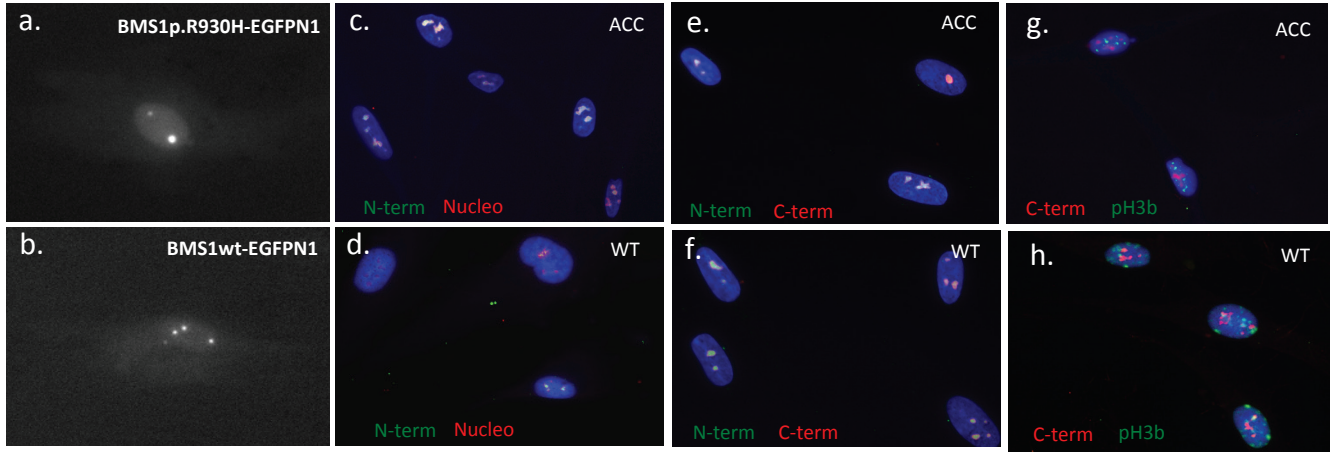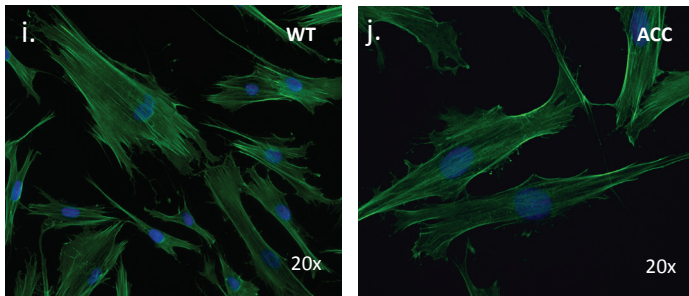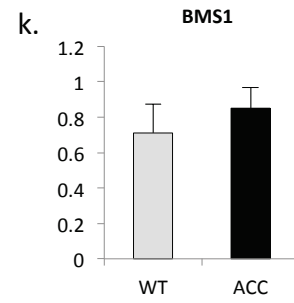

Supplemental Figure 1
