# Supplementary material for: BMS1 Is Mutated in Aplasia Cutis Congenita
Source: PubMed Central journal article supplement (PMC3681727; doi:10.1371/journal.pgen.1003573), 2013-06-13
Supplement: pgen.1003573.s003.pdf [file pgen.1003573.s003.pdf]

| gene                                                                         | EntrezGene        | WT-1   | WT-2   | WT-3   | ACC-1   | ACC-2   | ACC-3   | fold change | P value  |
|------------------------------------------------------------------------------|-------------------|--------|--------|--------|---------|---------|---------|-------------|----------|
| ES cell associated transcript 8                                              | 91646             | 55.55  | 49.08  | 73.15  | 3215.4  | 4201.35 | 3818.96 | 63.21       | 0.00605  |
| similar to Tektin-3 /// hypothetical protein LO 389830 /// 642398            |                   | 70.54  | 86.23  | 98.21  | 1162.25 | 1369.02 | 1484.63 | 15.94       | 0.005301 |
| keratin, hair, acidic, 4                                                     | 3885              | 238.19 | 249.77 | 284.67 | 2259.44 | 3607.06 | 2795.2  | 11.24       | 0.021824 |
| similar to Tektin-3 /// similar to hypothetical protein LOC389830 /// 389833 |                   | 109.69 | 102.19 | 94.06  | 823.66  | 994.29  | 1011.85 | 9.29        | 0.00193  |
| similar to Tektin-3 /// similar to hypothetical protein LOC389830 /// 389833 |                   | 114.94 | 117.51 | 112.12 | 844.85  | 1010.04 | 1081.49 | 8.54        | 0.00415  |
| pregnancy specific beta-1-glycoprotein 7                                     | 5676              | 716.17 | 195.49 | 247.58 | 3006.1  | 1633.28 | 1641.98 | 5.68        | 0.048266 |
| glutathione S-transferase theta 2                                            | 2953              | 121.22 | 143.31 | 120.35 | 643.02  | 729.16  | 666.52  | 5.31        | 0.000765 |
| myxovirus (influenza virus) resistance 1, intergenic                         | 4599              | 68.22  | 67.8   | 72.73  | 449.76  | 322.13  | 291.77  | 5.1         | 0.025725 |
| hypothetical LOC654433                                                       | 654433            | 93.28  | 93.23  | 94.34  | 417     | 474.49  | 420.25  | 4.67        | 0.000632 |
| keratin, hair, acidic, 3A                                                    | 3883              | 111.11 | 129.72 | 125.21 | 444.51  | 581.05  | 496.64  | 4.19        | 0.00566  |
| Phosphatase and actin regulator 2                                            | 9749              | 664.52 | 563.25 | 507.83 | 1881.19 | 1777.22 | 2808.97 | 3.73        | 0.038475 |
| type 1 tumor necrosis factor receptor sheddible domain                       | 51752             | 25.04  | 52.84  | 59.41  | 142.18  | 192.97  | 171.65  | 3.7         | 0.004824 |
| angiotensin II receptor, type 1                                              | 185               | 239.04 | 251.71 | 291.39 | 654.94  | 1079.38 | 1063.13 | 3.61        | 0.038996 |
| beta 1,3-galactosyltransferase-like                                          | 145173            | 217.12 | 248.22 | 274.46 | 815.24  | 922.5   | 924.73  | 3.6         | 0.000959 |
| B cell RAG associated protein                                                | 51363             | 133.51 | 128.79 | 167.88 | 601.21  | 482.66  | 430.27  | 3.5         | 0.014365 |
| churchill domain containing 1                                                | 91612             | 851.62 | 837.87 | 868.83 | 2639.07 | 2909.05 | 2722.48 | 3.24        | 0.000986 |
| Holocarboxylase synthetase (biotin-(propionyl)-CoA)                          | 3141              | 46.78  | 50.41  | 45.26  | 168.21  | 144.12  | 145.54  | 3.19        | 0.002204 |
| progesterone and adipoQ receptor family member 2                             | 54852             | 202.88 | 139.95 | 163.35 | 481.66  | 510.62  | 490.2   | 2.92        | 0.000522 |
| progesterone and adipoQ receptor family member 1                             | 54852             | 364.99 | 256.6  | 309.03 | 936.11  | 856.12  | 862.46  | 2.85        | 0.000196 |
| hypothetical protein LOC63929                                                | 63929             | 116.04 | 116.15 | 111.25 | 340.78  | 305.91  | 326.78  | 2.83        | 0.000378 |
| ST8 alpha-N-acetylneuraminidase alpha-2,8-sialinase                          | 8128              | 59.4   | 60.93  | 82.1   | 131.02  | 224.16  | 191.07  | 2.77        | 0.043205 |
| dickkopf homolog 2 (Xenopus laevis)                                          | 27123             | 59.77  | 57.96  | 70.38  | 151.25  | 188.78  | 172.73  | 2.73        | 0.00423  |
| hypothetical protein FLJ10781                                                | 55228             | 147.12 | 108.6  | 113.04 | 400.74  | 311.92  | 291.5   | 2.72        | 0.014368 |
| glutathione S-transferase M2 (muscle)                                        | 2946              | 514.95 | 709.14 | 642.72 | 1557.28 | 1579.3  | 1692.33 | 2.6         | 0.000549 |
| Elongation factor, RNA polymerase II, 2                                      | 22936             | 143.72 | 144.13 | 86.86  | 257.24  | 324.61  | 373.58  | 2.57        | 0.015206 |
| hypothetical protein LOC644246 /// hypothetical protein LOC644246            | 649063            | 192.68 | 237.39 | 246.07 | 570     | 546.7   | 585.64  | 2.52        | 0.000496 |
| glutathione S-transferase M1                                                 | 2944              | 505.8  | 648.79 | 640.46 | 1475.4  | 1510.88 | 1549.24 | 2.51        | 0.000633 |
| lectin, galactoside-binding, soluble, 8 (galec)                              | 3964              | 144.88 | 98.85  | 98.72  | 297.1   | 268.65  | 283.17  | 2.47        | 0.00181  |
| cholinergic receptor, nicotinic, alpha 10                                    | 57053             | 124.81 | 122.23 | 114.92 | 253.18  | 387.33  | 262.33  | 2.47        | 0.046359 |
| hypothetical protein LOC130576                                               | 130576            | 283.08 | 411.89 | 347.35 | 809.21  | 900.4   | 866.81  | 2.47        | 0.000726 |
| prostate collagen triple helix                                               | 542767            | 85.07  | 93.08  | 95.47  | 215.21  | 232.86  | 217.65  | 2.43        | 0.000763 |
| Similar to FRAS1-related extracellular matrix protein                        | 387904            | 67.77  | 75.46  | 72.95  | 208.35  | 158.74  | 155.62  | 2.43        | 0.022485 |
| Ras interacting protein 1                                                    | 54922             | 152.73 | 147.86 | 154.81 | 337.84  | 383.91  | 346.6   | 2.35        | 0.002533 |
| glutathione S-transferase M1                                                 | 2944              | 480.24 | 611.74 | 563.53 | 1314.98 | 1197.95 | 1302.75 | 2.3         | 0.000259 |
| cystin 1 /// similar to cystin 1                                             | 192668 /// 649824 | 79.47  | 122.45 | 124.25 | 185.75  | 260.72  | 302.48  | 2.3         | 0.040342 |
| interleukin 1 receptor accessory protein                                     | 3556              | 283.12 | 265.28 | 292.4  | 691.34  | 609.83  | 590.61  | 2.24        | 0.00331  |
| Paired box gene 8                                                            | 7849              | 166.36 | 162.36 | 155.53 | 346.55  | 385.52  | 349.89  | 2.24        | 0.001083 |
| hypothetical LOC653140                                                       | 653140            | 83.84  | 92.45  | 93.51  | 219.17  | 176.45  | 211.18  | 2.24        | 0.00439  |
| sushi domain containing 5                                                    | 26032             | 196.35 | 422.33 | 497.78 | 631.65  | 963.27  | 868.56  | 2.21        | 0.029752 |
| chromosome 6 open reading frame 105                                          | 84830             | 288.89 | 196.8  | 229.12 | 483.87  | 625.47  | 467.41  | 2.2         | 0.016481 |
| CDNA clone IMAGE:30721737                                                    |                   | 157.65 | 123.73 | 98.61  | 344.62  | 250.2   | 247.88  | 2.2         | 0.024324 |
| Guanylate binding protein 5                                                  | 115362            | 181.78 | 169.37 | 210.12 | 379.05  | 425.6   | 422.11  | 2.19        | 0.002063 |
| epithelial stromal interaction 1 (breast)                                    | 94240             | 226.93 | 202.49 | 194.81 | 549.85  | 409.52  | 400.47  | 2.18        | 0.029081 |
| hypothetical gene supported by AK075484; LOC653140                           | 339804            | 487.99 | 629.25 | 645.22 | 1192.08 | 1285.24 | 1353.04 | 2.17        | 0.00071  |
| endomucin                                                                    | 51705             | 73.97  | 111.66 | 127.29 | 178.96  | 240.36  | 257.2   | 2.14        | 0.024701 |
| zinc finger protein 77                                                       | 58492             | 208.89 | 233.95 | 218.25 | 396.87  | 529.09  | 480.39  | 2.14        | 0.020549 |

|                                                            |        |         |         |         |         |         |         |      |          |
|------------------------------------------------------------|--------|---------|---------|---------|---------|---------|---------|------|----------|
| ADAM metallopeptidase domain 33                            | 80332  | 319.62  | 276.09  | 279.25  | 680.95  | 509.04  | 686.68  | 2.13 | 0.022749 |
| hypothetical protein MGC52057                              | 130574 | 249.32  | 202.52  | 216.01  | 427.12  | 488.46  | 466.95  | 2.1  | 0.001598 |
| Aldo-keto reductase family 1, member C2 (d                 | 1646   | 139.33  | 134.42  | 135.08  | 268.77  | 307.54  | 270.41  | 2.09 | 0.00706  |
| cysteine dioxygenase, type I                               | 1036   | 212.8   | 209.09  | 245.07  | 382.2   | 484.03  | 502.35  | 2.08 | 0.015847 |
| carboxypeptidase E                                         | 1363   | 445.28  | 611.36  | 680.08  | 1177.2  | 1149.6  | 1273.46 | 2.07 | 0.004187 |
| ribosomal protein S23                                      | 6228   | 291.62  | 179.84  | 236.81  | 568.33  | 374.86  | 514.5   | 2.05 | 0.030784 |
| hypothetical protein MGC52057                              | 130574 | 396.12  | 301.19  | 335.75  | 721.33  | 707.88  | 671.71  | 2.04 | 0.000917 |
| molybdenum cofactor sulfurase                              | 55034  | 288.78  | 375.74  | 389.15  | 609.84  | 769.19  | 755.75  | 2.03 | 0.00728  |
| hypothetical protein LOC286434                             | 286434 | 298.2   | 268.41  | 266.83  | 490.35  | 555.34  | 592.88  | 1.97 | 0.006158 |
| gb:BF002195 /DB_XREF=gi:10702470 /DB_XREF=7h23h07.x        |        | 194.74  | 288.86  | 308.14  | 563.13  | 448.44  | 553.49  | 1.97 | 0.009035 |
| low density lipoprotein receptor-related prote             | 84918  | 2718.21 | 2339.09 | 2599.18 | 5798.74 | 4460.3  | 4617.47 | 1.94 | 0.022967 |
| CDC42 small effector 2                                     | 56990  | 249.95  | 256.1   | 258.69  | 399.49  | 566.44  | 514.97  | 1.94 | 0.039286 |
| hypothetical gene supported by BC041875;                   | 400642 | 199.6   | 244.08  | 241.25  | 408.11  | 463.15  | 434.61  | 1.91 | 0.001322 |
| Full-length cDNA clone CS0DF025YA01 of Fetal brain of Homc |        | 342.88  | 335.55  | 382.27  | 640.55  | 716.62  | 675.53  | 1.91 | 0.001877 |
| ADAM metallopeptidase domain 12 (meltrin                   | 8038   | 125.02  | 108.11  | 129.88  | 255.22  | 226.16  | 219.07  | 1.91 | 0.003154 |
| golgi autoantigen, golgin subfamily a, 8B                  | 440270 | 185.28  | 208     | 191.71  | 326.87  | 371.45  | 401.21  | 1.89 | 0.006801 |
| transmembrane protein 16C                                  | 63982  | 197.83  | 147.27  | 161.45  | 390     | 272.47  | 299.83  | 1.88 | 0.036109 |
| ribonuclease P 25kDa subunit                               | 54913  | 508.33  | 344.94  | 390.08  | 789.02  | 810.19  | 721.03  | 1.85 | 0.005945 |
| FLJ20160 protein                                           | 54842  | 446.6   | 348.92  | 372.75  | 752.21  | 711.77  | 695.68  | 1.84 | 0.001689 |
| cadherin 13, H-cadherin (heart)                            | 1012   | 518.66  | 959.92  | 904.42  | 1121.55 | 1524.9  | 1705.57 | 1.83 | 0.044931 |
| hypothetical protein KIAA1833                              | 377711 | 444.6   | 283.85  | 308.55  | 755.01  | 583.85  | 549.23  | 1.83 | 0.02659  |
| similar to FRG1 protein (FSHD region gene                  | 642236 | 276.06  | 282.61  | 315.08  | 441.68  | 588.82  | 578.99  | 1.83 | 0.028274 |
| phospholipase C, beta 4                                    | 5332   | 910.39  | 982.85  | 1183.4  | 1567.21 | 2025    | 2015.44 | 1.82 | 0.017133 |
| proliferation-inducing protein 38                          | 55068  | 202.94  | 253.96  | 254.81  | 337.74  | 487.42  | 461.75  | 1.81 | 0.041791 |
| Transcribed locus                                          |        | 216.41  | 236.32  | 279.99  | 401.19  | 473.14  | 452.82  | 1.81 | 0.003618 |
| COBL-like 1                                                | 22837  | 895.48  | 759.62  | 909.33  | 1502.15 | 1538.46 | 1557.9  | 1.8  | 0.000813 |
| butyrophilin, subfamily 3, member A2                       | 11118  | 414.69  | 419.58  | 395.06  | 819.18  | 657.36  | 719.26  | 1.79 | 0.016862 |
| hypothetical protein FLJ21901                              | 79675  | 996.43  | 773.67  | 870.55  | 1500.78 | 1661.2  | 1562.96 | 1.79 | 0.00136  |
| CDNA clone IMAGE:3960708                                   |        | 604.84  | 582.83  | 580.03  | 1159.7  | 997.22  | 1007.84 | 1.79 | 0.006381 |
| phospholipase C, beta 4                                    | 5332   | 1003.77 | 981.28  | 987.6   | 1769.05 | 1475.58 | 2047.86 | 1.78 | 0.040406 |
| Zic family member 1 (odd-paired homolog, I                 | 7545   | 186.41  | 296.63  | 330.54  | 401.47  | 508.64  | 539.2   | 1.78 | 0.02744  |
| sphingomyelin phosphodiesterase 1, acid ly                 | 6609   | 1513.29 | 1623.8  | 1709.62 | 2813.89 | 2877.96 | 2912.12 | 1.78 | 0.000118 |
| UDP-N-acetyl-alpha-D-galactosamine:polyp                   | 11227  | 424.96  | 485.75  | 538.63  | 1011.8  | 733.8   | 847.03  | 1.78 | 0.026154 |
| GDNF family receptor alpha 1                               | 2674   | 139.7   | 153.03  | 177.99  | 232.5   | 328.35  | 271.15  | 1.77 | 0.039479 |
| chromosome 7 open reading frame 10                         | 79783  | 290.8   | 413.76  | 363.98  | 641.67  | 614.21  | 636.8   | 1.77 | 0.01206  |
| mutated in colorectal cancers                              | 4163   | 467.42  | 329.75  | 365.42  | 837.28  | 627.28  | 588.04  | 1.77 | 0.041239 |
| spermatogenesis associated 18 homolog (ra                  | 132671 | 424.11  | 620.95  | 675.57  | 1110.92 | 968.21  | 964.77  | 1.76 | 0.01375  |
| chromosome 11 open reading frame 54                        | 28970  | 441.57  | 500.42  | 487.58  | 916.82  | 789.74  | 788.06  | 1.74 | 0.005697 |
| ligand of numb-protein X 1                                 | 84708  | 355.16  | 267.4   | 286.61  | 536.84  | 502.77  | 524.72  | 1.74 | 0.007265 |
| Full-length cDNA clone CS0DF027YP13 of Fetal brain of Homc |        | 405.65  | 400.55  | 483.89  | 617.96  | 792.66  | 798.12  | 1.71 | 0.025936 |
| MLF1 interacting protein                                   | 79682  | 3056.34 | 2562    | 2570.34 | 4492.25 | 4869.91 | 4548.41 | 1.71 | 0.001245 |
| aldehyde dehydrogenase 1 family, member .                  | 220    | 4371.68 | 3864.25 | 4386.56 | 7797.14 | 6699.99 | 6951.97 | 1.7  | 0.004941 |
| DKFZP564C152 protein                                       | 26120  | 307.85  | 387.96  | 377.31  | 532.81  | 661.13  | 630.89  | 1.7  | 0.009714 |
| transporter 2, ATP-binding cassette, sub-fan               | 6891   | 349.14  | 312.89  | 332.75  | 538.53  | 591.75  | 548.18  | 1.7  | 0.003158 |
| MRNA; cDNA DKFZp762I0915 (from clone DKFZp762I0915)        |        | 163.82  | 171.52  | 198.32  | 270.43  | 340.19  | 305.67  | 1.7  | 0.015537 |
| MLF1 interacting protein                                   | 79682  | 282.15  | 231.04  | 225.94  | 371.66  | 447.54  | 411.75  | 1.67 | 0.007021 |
| Hypothetical protein LOC642775                             | 642775 | 723.91  | 623.99  | 710.58  | 1182.28 | 1117.57 | 1089.53 | 1.66 | 0.000795 |

|                                                                 |        |          |          |          |          |          |          |      |          |
|-----------------------------------------------------------------|--------|----------|----------|----------|----------|----------|----------|------|----------|
| Chromosome 21 open reading frame 113                            | 378825 | 150.27   | 156.47   | 145.17   | 260.28   | 247.52   | 244.75   | 1.66 | 0.004301 |
| Transcribed locus                                               |        | 223.12   | 135.55   | 156.23   | 262.72   | 317.73   | 272.77   | 1.65 | 0.031952 |
| Hypothetical protein LOC143381                                  | 143381 | 253.1    | 304.42   | 352.35   | 454.24   | 532.43   | 523.51   | 1.65 | 0.009729 |
| copine I                                                        | 8904   | 1027.75  | 978.03   | 961.79   | 1805.8   | 1539.19  | 1557.84  | 1.64 | 0.009106 |
| neural cell adhesion molecule 1                                 | 4684   | 317.14   | 366.16   | 359.01   | 502.45   | 600.34   | 611.07   | 1.64 | 0.013894 |
| fibronectin type III domain containing 1                        | 84624  | 335.98   | 303.06   | 295.43   | 435.25   | 550.12   | 553.21   | 1.64 | 0.027133 |
| transmembrane protein 17                                        | 200728 | 285.05   | 331.88   | 308.97   | 534.63   | 480.53   | 516.06   | 1.64 | 0.002253 |
| dihydropyrimidinase-like 4                                      | 10570  | 201.73   | 217.31   | 244.05   | 321.06   | 407.38   | 352.4    | 1.63 | 0.022118 |
| hypothetical protein MGC52057                                   | 130574 | 233.52   | 190.18   | 215.77   | 320.9    | 376.92   | 340.54   | 1.63 | 0.007179 |
| NGFRAP1-like 1                                                  | 340542 | 197.15   | 222.06   | 210.15   | 330.26   | 332.95   | 358.52   | 1.62 | 0.009676 |
| programmed cell death 6 /// hypothetical pro 10016 /// 650280 / |        | 268.73   | 231.81   | 244.68   | 392.43   | 406.75   | 405.35   | 1.62 | 0.000862 |
| spastic paraplegia 3A (autosomal dominant)                      | 51062  | 351.08   | 366.65   | 361.83   | 577.35   | 547.73   | 616.39   | 1.61 | 0.003281 |
| tumor necrosis factor (ligand) superfamily, r                   | 8742   | 360.72   | 310.53   | 336.77   | 626.04   | 500.55   | 494.6    | 1.6  | 0.031221 |
| docking protein 5                                               | 55816  | 2409.6   | 1900.25  | 2125.47  | 4001.35  | 3188.24  | 3126.69  | 1.6  | 0.027122 |
| hypothetical gene supported by AK128780 / .388312 /// 399844    |        | 244.77   | 321.59   | 294.47   | 400.18   | 507.89   | 486.57   | 1.6  | 0.020061 |
| aldo-keto reductase family 1, member C1 (d                      | 1645   | 9831.87  | 7086.82  | 6497.3   | 14521.43 | 11506.52 | 11328.23 | 1.59 | 0.033715 |
| phosphoglucomutase 2-like 1                                     | 283209 | 953.75   | 814.18   | 771.58   | 1393.38  | 1261.4   | 1386.44  | 1.59 | 0.002564 |
| prostaglandin F2 receptor negative regulato                     | 5738   | 374.57   | 386.17   | 390.87   | 688.66   | 573.26   | 564.16   | 1.58 | 0.020242 |
| crystallin, zeta (quinone reductase)                            | 1429   | 1888.54  | 2001.11  | 2113.88  | 2633.98  | 3408.61  | 3349.63  | 1.57 | 0.037547 |
| 3'-phosphoadenosine 5'-phosphosulfate syn                       | 9060   | 6000.06  | 6492.67  | 7130.32  | 10926.4  | 10028.22 | 10036.85 | 1.57 | 0.001611 |
| periostin, osteoblast specific factor                           | 10631  | 14796.2  | 15365.66 | 15926.17 | 25941.34 | 23531.32 | 22956.16 | 1.57 | 0.004476 |
| poliovirus receptor                                             | 5817   | 691.85   | 605.82   | 630.4    | 984.98   | 1054.37  | 997.56   | 1.57 | 0.001189 |
| transmembrane 9 superfamily member 3                            | 56889  | 5204.53  | 4282.73  | 4636.13  | 7575.15  | 7215.15  | 7393.39  | 1.57 | 0.00433  |
| similar to RIKEN cDNA 1110018M03                                | 387758 | 393.03   | 451.94   | 443.53   | 628.03   | 696.13   | 711.14   | 1.57 | 0.005316 |
| Neural cell adhesion molecule 1                                 | 4684   | 360.25   | 544.1    | 558.67   | 642.69   | 815.27   | 845.82   | 1.57 | 0.042558 |
| aldo-keto reductase family 1, member C1 (d                      | 1645   | 12800.43 | 9670.58  | 9130.71  | 18247.55 | 16046.6  | 14999.6  | 1.56 | 0.018506 |
| aldo-keto reductase family 1, member C2 (d                      | 1646   | 10666.9  | 7993.42  | 7544.51  | 15597.7  | 12939.5  | 12488.8  | 1.56 | 0.023857 |
| gb:BF437011 /DB_XREF=gi:11449329 /DB_XREF=7p61e06.x             |        | 604.1    | 503.24   | 538.85   | 898.4    | 875.78   | 792.5    | 1.56 | 0.00343  |
| chromosome 11 open reading frame 54                             | 28970  | 281.52   | 326.01   | 274.65   | 538.51   | 384.11   | 458.12   | 1.56 | 0.049211 |
| vacuolar protein sorting 26 homolog A (yeas                     | 9559   | 7433.31  | 5844.86  | 6172.09  | 11837.64 | 9545.05  | 8972.64  | 1.55 | 0.034657 |
| 1-aminocyclopropane-1-carboxylate synthas                       | 84680  | 165.08   | 208.83   | 196.6    | 291.32   | 284.75   | 305.23   | 1.55 | 0.011066 |
| tripartite motif-containing 5                                   | 85363  | 414.36   | 456.45   | 458.8    | 634.92   | 691.59   | 724.58   | 1.54 | 0.004436 |
| phosphogluconate dehydrogenase /// phosp                        | 5226   | 1315.05  | 1644.15  | 1549.64  | 2299.52  | 2013.08  | 2573.57  | 1.53 | 0.020334 |
| exostoses (multiple) 2                                          | 2132   | 1765.18  | 2076.81  | 2301.26  | 2918.43  | 3405.48  | 3103.52  | 1.53 | 0.009729 |
| insulin-like growth factor 2 mRNA binding pr                    | 10643  | 339.46   | 238.85   | 292.93   | 434      | 489.9    | 407.46   | 1.53 | 0.018722 |
| butyrophilin, subfamily 3, member A2                            | 11118  | 252.53   | 240.74   | 267.73   | 414.02   | 391.86   | 361.97   | 1.53 | 0.00471  |
| N-acylsphingosine amidohydrolase (acid cei                      | 427    | 1082.73  | 1391.44  | 1472.35  | 1993.79  | 2070.17  | 2001.57  | 1.53 | 0.021914 |
| TBC1 domain family, member 2                                    | 55357  | 488.24   | 508.76   | 541.48   | 729.04   | 857.45   | 768.64   | 1.52 | 0.011402 |
| Hypothetical protein LOC642351                                  | 642351 | 225.85   | 229.13   | 232.12   | 315.71   | 372.33   | 355.2    | 1.52 | 0.017348 |
| Transcribed locus                                               |        | 234.52   | 216.84   | 248.39   | 355.77   | 336.45   | 371.03   | 1.52 | 0.002142 |
| actin, alpha, cardiac muscle                                    | 70     | 8377.41  | 9334.73  | 10301.08 | 14273.07 | 13638.32 | 14422.93 | 1.51 | 0.006015 |
| HIV-1 Tat interactive protein 2, 30kDa                          | 10553  | 2564.62  | 2434.28  | 2490.71  | 4112.21  | 3675.68  | 3554.57  | 1.51 | 0.011348 |
| platelet derived growth factor C                                | 56034  | 891.07   | 735.96   | 728.12   | 1267.19  | 1131.07  | 1149.89  | 1.51 | 0.005501 |
| G protein-coupled receptor, family C, group                     | 51704  | 266.41   | 254.34   | 244.58   | 435.52   | 338.51   | 382.7    | 1.51 | 0.035088 |
| iroquois homeobox protein 1                                     | 79192  | 896.67   | 890.07   | 895.07   | 1364.17  | 1344.38  | 1334.12  | 1.51 | 0.000095 |
| proteoglycan 1, secretory granule                               | 5552   | 491.19   | 555.11   | 577.76   | 841.3    | 772.86   | 828.74   | 1.5  | 0.003355 |
| butyrophilin, subfamily 3, member A3 /// buty 10384 /// 11118   |        | 675.96   | 683      | 693.96   | 1132.3   | 998.42   | 954.24   | 1.5  | 0.017933 |

|                                                                 |        |         |         |         |          |          |          |      |          |
|-----------------------------------------------------------------|--------|---------|---------|---------|----------|----------|----------|------|----------|
| laminin, alpha 2 (merosin, congenital muscu                     | 3908   | 685.74  | 830.43  | 872.1   | 1148.26  | 1236.7   | 1192.02  | 1.5  | 0.00857  |
| GUF1 GTPase homolog (S. cerevisiae)                             | 60558  | 816.54  | 619.21  | 771.54  | 1038.24  | 1187.39  | 1075.66  | 1.5  | 0.010527 |
| Zinc finger, DHHC-type containing 3                             | 51304  | 207.8   | 210.57  | 208.17  | 278.32   | 351.17   | 314.52   | 1.5  | 0.034175 |
| hypothetical protein                                            | 22998  | 225.78  | 253.66  | 248.6   | 385.25   | 306.12   | 393.92   | 1.49 | 0.038896 |
| Transcribed locus                                               |        | 225.5   | 275.09  | 304.2   | 352.16   | 432.14   | 424.95   | 1.49 | 0.029549 |
| CWF19-like 1, cell cycle control (S. pombe)                     | 55280  | 874.47  | 782.52  | 876.41  | 1082.33  | 1439.04  | 1271.07  | 1.49 | 0.049873 |
| vacuolar protein sorting 41 (yeast)                             | 27072  | 310.7   | 386.22  | 434.14  | 607.49   | 546.4    | 551.64   | 1.49 | 0.02406  |
| Transcribed locus, moderately similar to NP_055301.1 neuron     |        | 266.52  | 210.52  | 226.77  | 341.42   | 366.16   | 351.68   | 1.49 | 0.011779 |
| zinc finger protein 575                                         | 284346 | 315.59  | 287.36  | 354.09  | 497.4    | 475.83   | 456.1    | 1.49 | 0.005809 |
| signal-regulatory protein alpha                                 | 140885 | 1628.82 | 1886.59 | 2036.27 | 2481.93  | 2898.8   | 2854.26  | 1.48 | 0.008867 |
| ninjurin 1                                                      | 4814   | 351.51  | 394.88  | 390.09  | 554.29   | 548.72   | 584.19   | 1.48 | 0.002091 |
| zinc fingers and homeoboxes 2                                   | 22882  | 490.13  | 485.01  | 544.67  | 745.61   | 775.59   | 725.65   | 1.48 | 0.001168 |
| golgi autoantigen, golgin subfamily a, 8G /// 283768 /// 388080 |        | 381.02  | 392.03  | 389.94  | 509.69   | 600.19   | 625.93   | 1.48 | 0.026064 |
| nudix (nucleoside diphosphate linked moiety                     | 55270  | 2276.76 | 1890.61 | 1886.4  | 2940.88  | 3009.4   | 2995.16  | 1.48 | 0.011933 |
| toll-like receptor 4 /// toll-like receptor 4                   | 7099   | 220.82  | 258.02  | 288.75  | 395.42   | 344.25   | 394.79   | 1.48 | 0.011079 |
| Archaemetzincins-2                                              | 51321  | 363.94  | 347.64  | 372.55  | 564.21   | 527.74   | 521.67   | 1.48 | 0.00279  |
| CDNA FLJ46881 fis, clone UTERU3015647, moderately simil         |        | 943.65  | 750.1   | 742.47  | 1312.37  | 1210.48  | 1116.15  | 1.48 | 0.013285 |
| phosphoglucomutase 2-like 1                                     | 283209 | 358.05  | 265.54  | 330.83  | 464.08   | 521.57   | 428.62   | 1.48 | 0.019012 |
| hypothetical LOC401093                                          | 401093 | 246.94  | 220.59  | 248.26  | 351.98   | 349.2    | 352.01   | 1.48 | 0.002819 |
| cyclin-dependent kinase inhibitor 1A (p21, C                    | 1026   | 7136.11 | 7395.06 | 7263.86 | 11217.1  | 10913.18 | 9870.4   | 1.47 | 0.010392 |
| glycine receptor, beta                                          | 2743   | 571.3   | 423.97  | 438.86  | 638.69   | 776.76   | 689.92   | 1.47 | 0.024238 |
| transient receptor potential cation channel, s                  | 7223   | 232.79  | 241     | 259     | 335.16   | 348.65   | 395.12   | 1.47 | 0.015232 |
| transcription elongation factor A (SII), 3                      | 6920   | 211.35  | 272.48  | 263.02  | 428.65   | 326.62   | 352.29   | 1.47 | 0.040885 |
| phosphoinositide-3-kinase, catalytic, delta p                   | 5293   | 781.74  | 658.22  | 692.52  | 912.93   | 1113.88  | 1074.33  | 1.46 | 0.019375 |
| ferritin, heavy polypeptide 1                                   | 2495   | 4954.6  | 6960.84 | 6958.89 | 9418.91  | 9104.29  | 9090.16  | 1.46 | 0.04717  |
| nexilin (F actin binding protein)                               | 91624  | 918.61  | 890.46  | 963.24  | 1224.96  | 1390.86  | 1434.58  | 1.46 | 0.013573 |
| gb:BF059209 /DB_XREF=gi:10813105 /DB_XREF=7k56b09.x             |        | 255.83  | 301.8   | 335.7   | 371.91   | 488.75   | 450.58   | 1.46 | 0.040463 |
| laminin, alpha 2 (merosin, congenital muscu                     | 3908   | 459.67  | 534.58  | 538.86  | 739.56   | 699.92   | 774.56   | 1.45 | 0.004946 |
| cat eye syndrome chromosome region, canc                        | 27440  | 1371.2  | 1372.55 | 1382.56 | 1912.69  | 2133.09  | 1954.27  | 1.45 | 0.007635 |
| transmembrane protein 80                                        | 283232 | 720.24  | 779.76  | 899.22  | 1051.6   | 1231.1   | 1201.16  | 1.45 | 0.012568 |
| G protein-coupled receptor 177                                  | 79971  | 1265.91 | 884.67  | 951.27  | 1576.14  | 1525.26  | 1383.35  | 1.45 | 0.040695 |
| CDNA FLJ33420 fis, clone BRACE2020028                           |        | 478.16  | 420.1   | 470.42  | 561.48   | 732.8    | 688.8    | 1.45 | 0.049826 |
| neurocalcin delta /// neurocalcin delta                         | 83988  | 303.94  | 234.04  | 262.68  | 353.34   | 418.11   | 376.52   | 1.44 | 0.02062  |
| major histocompatibility complex, class II, D                   | 3113   | 688.18  | 528.07  | 620.6   | 869.14   | 879.18   | 900.34   | 1.44 | 0.01786  |
| FYVE and coiled-coil domain containing 1                        | 79443  | 550.65  | 527     | 621     | 833.42   | 821.75   | 798      | 1.44 | 0.006162 |
| MRS2-like, magnesium homeostasis factor (                       | 57380  | 491.95  | 443.88  | 435.7   | 595.86   | 679.91   | 693.87   | 1.44 | 0.013012 |
| family with sequence similarity 91, member ,                    | 57234  | 436.42  | 436.86  | 477.56  | 671.14   | 632.47   | 643.87   | 1.44 | 0.000966 |
| carbonic anhydrase XIII                                         | 377677 | 349.26  | 361.82  | 384.01  | 459.88   | 593.03   | 527.16   | 1.44 | 0.045282 |
| exostoses (multiple) 2                                          | 2132   | 1512.89 | 1503.48 | 1670.18 | 2335.66  | 2316.57  | 2074.29  | 1.43 | 0.006151 |
| roundabout, axon guidance receptor, homol                       | 6091   | 2766.82 | 2632.07 | 3032.07 | 3849.09  | 4188.99  | 3966.86  | 1.43 | 0.002493 |
| chromosome 20 open reading frame 23                             | 55614  | 344.37  | 256.47  | 299.48  | 452.91   | 389.59   | 439.36   | 1.43 | 0.019336 |
| membrane-associated ring finger (C3HC4) f                       | 54708  | 680.56  | 572.75  | 647.34  | 823.66   | 954.22   | 930.87   | 1.43 | 0.014547 |
| similar to RIKEN cDNA 1500009M05 gene                           | 493856 | 1211.11 | 1013.14 | 981.95  | 1589.01  | 1627.73  | 1355.25  | 1.43 | 0.016521 |
| Hypothetical protein LOC125150                                  | 125150 | 798.9   | 823.4   | 733.43  | 1109.64  | 1104.88  | 1132.42  | 1.43 | 0.001903 |
| Opsin 1 (cone pigments), short-wave-sensiti                     | 611    | 1263.78 | 1444.23 | 1574.73 | 1924.98  | 2114.25  | 2063.72  | 1.43 | 0.013593 |
| ARP2 actin-related protein 2 homolog (yeas                      | 10097  | 8435.13 | 7109.31 | 8300.81 | 11176.06 | 10561.25 | 12050.82 | 1.42 | 0.00726  |
| KIAA0241                                                        | 23080  | 264.59  | 231.6   | 278.82  | 351.7    | 380.2    | 369.37   | 1.42 | 0.006046 |

|                                                                 |        |         |          |         |          |          |          |      |          |
|-----------------------------------------------------------------|--------|---------|----------|---------|----------|----------|----------|------|----------|
| ABI gene family, member 3 (NESH) binding                        | 25890  | 2363.45 | 3261.94  | 3139.22 | 4224.78  | 4079.53  | 4157.84  | 1.42 | 0.046143 |
| methyltransferase like 4                                        | 64863  | 343.64  | 307.32   | 341.1   | 425.07   | 511.19   | 481.87   | 1.42 | 0.023347 |
| programmed cell death 6                                         | 10016  | 1160.61 | 1001.71  | 1013.98 | 1414.78  | 1540.41  | 1523.07  | 1.42 | 0.003959 |
| SH3KBP1 binding protein 1                                       | 92799  | 492.44  | 501.78   | 567.36  | 706.96   | 782.74   | 716.77   | 1.41 | 0.005988 |
| Keratin associated protein 4-7                                  | 85287  | 1577.56 | 1155.36  | 1463.05 | 1929.44  | 2020.47  | 1968.91  | 1.41 | 0.035273 |
| Protein phosphatase 4, regulatory subunit 2                     | 151987 | 264.06  | 311.83   | 303.9   | 382.97   | 420.51   | 439.16   | 1.41 | 0.009445 |
| chondroitin sulfate proteoglycan 2 (versican)                   | 1462   | 8482.84 | 8242.12  | 8043.38 | 11497.42 | 11181.35 | 11946.47 | 1.4  | 0.001052 |
| chromosome 12 open reading frame 38                             | 79867  | 596.99  | 549.71   | 498.95  | 861.7    | 742.32   | 722.9    | 1.4  | 0.024529 |
| CDK5 regulatory subunit associated protein                      | 54901  | 287.88  | 250.59   | 255.91  | 381.23   | 362.26   | 369.05   | 1.4  | 0.004211 |
| CDNA FLJ11754 fis, clone HEMBA1005588                           |        | 296.83  | 295.24   | 299.54  | 396.77   | 380.6    | 469.11   | 1.4  | 0.047612 |
| host cell factor C1 regulator 1 (XPO1 depen                     | 54985  | 1190.82 | 1307.6   | 1161.55 | 1936.95  | 1559.35  | 1607.16  | 1.4  | 0.039372 |
| G elongation factor, mitochondrial 1                            | 85476  | 2422.71 | 2166.96  | 2381.13 | 3037.62  | 3462.67  | 3243.02  | 1.4  | 0.005888 |
| Fraser syndrome 1                                               | 80144  | 869.9   | 799.57   | 1010.75 | 1363.01  | 1136.03  | 1272.57  | 1.4  | 0.018    |
| poly (ADP-ribose) polymerase family, memb                       | 84875  | 504.82  | 505.68   | 514.12  | 786.18   | 690.6    | 667.72   | 1.4  | 0.020711 |
| KIAA1345 protein                                                | 57545  | 377.81  | 358.49   | 432.81  | 496.38   | 573.67   | 561.33   | 1.4  | 0.015549 |
| chondroitin sulfate proteoglycan 2 (versican)                   | 1462   | 3236.17 | 3587.56  | 3967.33 | 4783.41  | 4806.29  | 5414.9   | 1.39 | 0.010559 |
| UPF3 regulator of nonsense transcripts hor                      | 65110  | 1365.92 | 1552.61  | 1465.53 | 2050.68  | 2028.66  | 2005.25  | 1.39 | 0.004845 |
| Full-length cDNA clone CS0DI001YP15 of Placenta Cot 25-nor      |        | 288.75  | 325.25   | 331.43  | 387.53   | 460.98   | 463.5    | 1.39 | 0.028494 |
| collagen, type XXVII, alpha 1                                   | 85301  | 711.87  | 746.72   | 677.93  | 960.07   | 1029.46  | 962.17   | 1.39 | 0.003882 |
| CXYorf1-related protein /// family with seque 375690 /// 653440 |        | 937.63  | 802.41   | 785.12  | 1275.84  | 1123.67  | 1114.94  | 1.39 | 0.012665 |
| WD repeat domain, phosphoinositide interac                      | 26100  | 444.95  | 386.16   | 452.98  | 610.33   | 594.97   | 586.56   | 1.39 | 0.006692 |
| UPF3 regulator of nonsense transcripts hor                      | 65110  | 3031.19 | 3359.89  | 3614.47 | 4616.95  | 4659.76  | 4482.15  | 1.38 | 0.008422 |
| hypothetical protein FLJ20699                                   | 55020  | 712.69  | 623.49   | 614.44  | 983.72   | 848.98   | 857.62   | 1.38 | 0.014555 |
| phosphoribosyl transferase domain containii                     | 56952  | 1802.62 | 1947.29  | 1932.87 | 2385.81  | 2760.24  | 2670.08  | 1.38 | 0.014843 |
| transmembrane protein with EGF-like and tv                      | 8577   | 1144    | 909.04   | 986.67  | 1504.22  | 1328.24  | 1346.7   | 1.37 | 0.017091 |
| laminin, alpha 2 (merosin, congenital muscu                     | 3908   | 510.92  | 604.32   | 623.26  | 846.57   | 747.39   | 793.33   | 1.37 | 0.012806 |
| RUN and FYVE domain containing 1                                | 80230  | 2068.99 | 1804.75  | 2157.72 | 2749.2   | 2921.68  | 2571.13  | 1.37 | 0.009338 |
| glucosaminyl (N-acetyl) transferase 1, core :                   | 2650   | 1071.78 | 973.1    | 984.41  | 1234.86  | 1400.67  | 1484.97  | 1.36 | 0.029365 |
| fatty acid desaturase 1                                         | 3992   | 2183.67 | 2069.66  | 2081.59 | 2960.14  | 3016.82  | 2659.74  | 1.36 | 0.01296  |
| gb:AU158251 /DB_XREF=gi:11019772 /DB_XREF=AU158251              |        | 320.18  | 352.8    | 358.94  | 483.49   | 446.82   | 473.6    | 1.36 | 0.007701 |
| misshapen-like kinase 1 (zebrafish)                             | 50488  | 398.96  | 338.73   | 381.35  | 485.26   | 545.28   | 496.49   | 1.36 | 0.009859 |
| Ribosomal protein S11                                           | 6205   | 888.17  | 783.62   | 793.8   | 1047.46  | 1127.96  | 1157.91  | 1.36 | 0.005683 |
| carbonyl reductase 4                                            | 84869  | 525.8   | 451.29   | 463.41  | 652.47   | 640.27   | 658.6    | 1.36 | 0.007948 |
| acireductone dioxygenase 1                                      | 55256  | 3562.58 | 4061.21  | 4130.03 | 5115.61  | 5321.61  | 5525.57  | 1.36 | 0.00611  |
| leucine rich repeat containing 8 family, mem                    | 55144  | 1572.11 | 1349.49  | 1418.3  | 1830.05  | 2114.02  | 1938.55  | 1.36 | 0.012658 |
| HSPC157 protein                                                 | 29092  | 492.62  | 478.71   | 467.45  | 689.98   | 654.62   | 622.69   | 1.36 | 0.005091 |
| lysyl oxidase-like 3                                            | 84695  | 857.45  | 913.53   | 886.41  | 1074.38  | 1325.08  | 1212.16  | 1.36 | 0.041083 |
| galactosylceramidase                                            | 2581   | 834.54  | 798.08   | 875.31  | 1189.07  | 1149.94  | 1063.15  | 1.35 | 0.006105 |
| zinc finger, FYVE domain containing 26                          | 23503  | 360.75  | 368.88   | 416.83  | 533.05   | 500.11   | 515.19   | 1.35 | 0.01056  |
| homeobox containing 1                                           | 79618  | 524.07  | 458.28   | 445.65  | 652.98   | 634.98   | 647.51   | 1.35 | 0.010614 |
| MANSC domain containing 1                                       | 54682  | 373.75  | 329.54   | 345.47  | 473.17   | 487.26   | 455.45   | 1.35 | 0.014676 |
| chondroitin sulfate proteoglycan 2 (versican)                   | 1462   | 9285.6  | 10025.32 | 10245.4 | 12140.91 | 13813.67 | 13804.81 | 1.35 | 0.013686 |
| hypothetical protein MGC16037                                   | 84973  | 2360.86 | 2333.97  | 2197.23 | 3088.25  | 3098.63  | 3125.04  | 1.35 | 0.001388 |
| homeobox B8                                                     | 3218   | 604.14  | 664.89   | 662.45  | 861.87   | 845.45   | 887.64   | 1.35 | 0.005501 |
| chromosome 9 open reading frame 30                              | 91283  | 4090.61 | 3708.59  | 3523.68 | 5220.55  | 5096.19  | 4947.83  | 1.35 | 0.005724 |
| caspase 9, apoptosis-related cysteine peptic                    | 842    | 428.31  | 490.39   | 459.2   | 604      | 601.65   | 638.24   | 1.34 | 0.007173 |
| olfactomedin-like 2B                                            | 25903  | 1714.83 | 1625.65  | 1654.43 | 2324.48  | 2272.73  | 2089.08  | 1.34 | 0.012884 |

|                                                            |        |          |          |          |         |         |         |       |          |
|------------------------------------------------------------|--------|----------|----------|----------|---------|---------|---------|-------|----------|
| transmembrane protein 50A                                  | 23585  | 4313.49  | 4148.18  | 4243.56  | 5881.08 | 5600.15 | 5670.6  | 1.34  | 0.000992 |
| chromosome 20 open reading frame 44                        | 55245  | 655.37   | 636.92   | 688.89   | 947.06  | 870.11  | 846.06  | 1.34  | 0.008945 |
| STEAP family member 3                                      | 55240  | 3363.1   | 2710.2   | 3004.7   | 3888.84 | 4141.31 | 4166.14 | 1.34  | 0.01608  |
| ADAM metallopeptidase domain 12 (meltrin                   | 8038   | 2587.09  | 2449.5   | 2528.53  | 3520.05 | 3328.38 | 3178.35 | 1.33  | 0.00639  |
| transmembrane protein 66                                   | 51669  | 4626.96  | 5013.39  | 5091.06  | 6209.55 | 6763.55 | 6523.29 | 1.32  | 0.003859 |
| chromosome 1 open reading frame 57                         | 84284  | 1059.94  | 1044.48  | 1127.42  | 1490.24 | 1391.24 | 1390.53 | 1.32  | 0.002173 |
| HIR histone cell cycle regulation defective h              | 7290   | 332.57   | 312.97   | 307.9    | 414.44  | 428.29  | 414.75  | 1.32  | 0.006084 |
| aldehyde oxidase 1                                         | 316    | 1673.47  | 1530.08  | 1493.59  | 2085.75 | 2094.13 | 1963.64 | 1.31  | 0.003465 |
| hypothetical protein FLJ20186                              | 54849  | 886.15   | 950      | 1015.8   | 1231.9  | 1226.76 | 1273.4  | 1.31  | 0.006842 |
| COBW domain containing 6                                   | 644019 | 4139.67  | 4515.5   | 4422.78  | 5534.41 | 5582.07 | 5957.48 | 1.31  | 0.00308  |
| Hypothetical protein FLJ40432                              | 151195 | 811.54   | 837.82   | 908.52   | 1073    | 1149.98 | 1136.83 | 1.31  | 0.004891 |
| transmembrane 9 superfamily protein memt                   | 9777   | 614.79   | 614.98   | 646.53   | 785.87  | 812.42  | 814.08  | 1.29  | 0.001472 |
| transcription factor-like 5 (basic helix-loop-h            | 10732  | 1511.45  | 1593.33  | 1570.97  | 1263.1  | 1226.06 | 1215.41 | -1.27 | 0.002515 |
| gb:AL121916 /DB_XREF=gi:7406639 /FEA=DNA_2 /CNT=1 /I       |        | 12049.81 | 11469.98 | 11725.38 | 9238.12 | 9301.56 | 9303.43 | -1.27 | 0.002166 |
| RaiA binding protein 1                                     | 10928  | 478.43   | 491.77   | 511.22   | 378.84  | 381.27  | 389.3   | -1.29 | 0.006104 |
| cell division cycle 2-like 1 (PITSLRE protein: 984 /// 985 |        | 1680.62  | 1545.09  | 1544.84  | 1235.19 | 1278.68 | 1150.19 | -1.3  | 0.005446 |
| tryptophanyl tRNA synthetase 2 (mitochondr                 | 10352  | 507.36   | 551.75   | 526.75   | 395.56  | 413.4   | 411.35  | -1.3  | 0.004913 |
| gb:AI200538 /DB_XREF=gi:3753144 /DB_XREF=qf93e08.x1 /      |        | 475.55   | 469.09   | 454.37   | 359.22  | 351.24  | 353.82  | -1.31 | 0.005048 |
| cAMP responsive element binding protein-lil                | 1388   | 596.76   | 653.56   | 609.61   | 491.89  | 442.77  | 485.36  | -1.31 | 0.006854 |
| tripartite motif-containing 4                              | 89122  | 1126.42  | 1157.11  | 1209.9   | 875.82  | 855.45  | 921.05  | -1.32 | 0.005506 |
| SMAD, mothers against DPP homolog 5 (Dr                    | 4090   | 3157.68  | 3165.4   | 3004.37  | 2430.1  | 2168.79 | 2493.23 | -1.32 | 0.005817 |
| SLIT-ROBO Rho GTPase activating protein                    | 23380  | 1423.85  | 1327.45  | 1328.83  | 1010.52 | 970.3   | 1103.51 | -1.32 | 0.004031 |
| GINS complex subunit 4 (Sld5 homolog) /// (                | 84296  | 979.82   | 905.09   | 886.24   | 680.94  | 670.11  | 716.93  | -1.33 | 0.008985 |
| UDP-Gal:betaGlcNAc beta 1,4- galactosyltr                  | 9334   | 2325.42  | 2133.95  | 2153.66  | 1672.39 | 1704.65 | 1545.89 | -1.34 | 0.003506 |
| prostaglandin-endoperoxide synthase 1 (prc                 | 5742   | 665.89   | 645.69   | 709.67   | 498.77  | 478.51  | 530.56  | -1.34 | 0.004449 |
| Similar to SLIT-ROBO Rho GTPase-activatii                  | 653464 | 1631.75  | 1515.2   | 1575.77  | 1176.43 | 1130.44 | 1228.51 | -1.34 | 0.00108  |
| succinate dehydrogenase complex, subunit                   | 255812 | 901.66   | 801.68   | 786.73   | 597.3   | 619.55  | 627.78  | -1.35 | 0.017611 |
| laminin, alpha 4                                           | 3910   | 4632.23  | 5021.62  | 5475.92  | 3848.52 | 3472.58 | 3887.85 | -1.36 | 0.020434 |
| neuroblastoma, suppression of tumorigenici                 | 4681   | 6663.11  | 7669.73  | 7636.9   | 5719.28 | 5207.27 | 5265.67 | -1.36 | 0.0157   |
| neuroblastoma, suppression of tumorigenici                 | 4681   | 4788.42  | 5413.93  | 5515.53  | 3990.23 | 3697.81 | 3780.46 | -1.37 | 0.015888 |
| serine palmitoyltransferase, long chain base               | 9517   | 933.01   | 832.87   | 871.14   | 659.01  | 630.98  | 640.83  | -1.37 | 0.006313 |
| Transcribed locus                                          |        | 2352.67  | 2436.6   | 2258.1   | 1838.15 | 1640.01 | 1664.31 | -1.37 | 0.001997 |
| carbonic anhydrase XII                                     | 771    | 605.92   | 663.66   | 715.91   | 480.46  | 445.2   | 517.3   | -1.38 | 0.015149 |
| cell division cycle 42 (GTP binding protein, 2             | 998    | 5260.65  | 5012.44  | 4825.68  | 3687.91 | 3319.29 | 3896.32 | -1.38 | 0.009496 |
| heme binding protein 2                                     | 23593  | 3433.27  | 3839.79  | 3675.09  | 2853.49 | 2421.13 | 2606.48 | -1.39 | 0.007149 |
| histone 1, H2bi                                            | 8346   | 834.85   | 759.54   | 799.04   | 489.66  | 652.79  | 578.9   | -1.39 | 0.02988  |
| TIP41, TOR signalling pathway regulator-like               | 261726 | 2029.67  | 1959.46  | 2261.39  | 1407.35 | 1663.71 | 1418.95 | -1.39 | 0.014709 |
| layilin                                                    | 143903 | 7229.64  | 8063.11  | 7608.96  | 5448.12 | 5464.52 | 5535.92 | -1.39 | 0.008611 |
| eukaryotic translation initiation factor 2 alpha           | 440275 | 401.59   | 355.71   | 375.66   | 239.87  | 289.21  | 276.26  | -1.39 | 0.013058 |
| fibroblast growth factor 5                                 | 2250   | 2119.86  | 1873.7   | 2060.63  | 1232.24 | 1570.6  | 1515.03 | -1.4  | 0.01531  |
| cell division cycle 2-like 1 (PITSLRE protein: 984 /// 985 |        | 450.3    | 427.87   | 458.67   | 317.91  | 300.33  | 343.13  | -1.4  | 0.006673 |
| peptidylprolyl isomerase (cyclophilin)-like 3 /            | 53938  | 2776.79  | 2876.06  | 2807.6   | 1973.77 | 2032.27 | 2037.74 | -1.4  | 0.000225 |
| microphthalmia-associated transcription fact               | 4286   | 392.08   | 342.93   | 368.45   | 268.32  | 247.55  | 272.64  | -1.4  | 0.007313 |
| SLIT-ROBO Rho GTPase activating protein                    | 57522  | 1737.67  | 1662.72  | 1717.36  | 1288.51 | 1099.08 | 1279.75 | -1.4  | 0.006405 |
| Transcribed locus                                          |        | 1909.94  | 1831.02  | 2121.71  | 1424.68 | 1364.7  | 1385.38 | -1.41 | 0.024146 |
| early growth response 1                                    | 1958   | 425.89   | 350.61   | 348.7    | 266.67  | 245.65  | 268.26  | -1.42 | 0.042997 |
| frizzled homolog 7 (Drosophila)                            | 8324   | 1776.4   | 1863.71  | 1888.52  | 1456.17 | 1095.55 | 1355.63 | -1.42 | 0.021671 |

|                                                       |        |          |         |          |         |         |         |       |          |
|-------------------------------------------------------|--------|----------|---------|----------|---------|---------|---------|-------|----------|
| milk fat globule-EGF factor 8 protein                 | 4240   | 586.35   | 710.84  | 689.69   | 448.65  | 477.3   | 474.51  | -1.42 | 0.031232 |
| phosphatidylinositol glycan, class Z                  | 80235  | 356.12   | 344.11  | 368.98   | 268.23  | 242.85  | 247.21  | -1.42 | 0.004608 |
| vascular endothelial growth factor C                  | 7424   | 10026.03 | 8982.78 | 10516.89 | 6772.93 | 7402.29 | 6609.17 | -1.43 | 0.008965 |
| serine racemase                                       | 63826  | 902.71   | 887.96  | 935.5    | 579.16  | 673.22  | 661.35  | -1.43 | 0.005135 |
| leucine zipper protein FKSG14                         | 64105  | 3405.75  | 2775.01 | 3003.97  | 1889.7  | 2453.55 | 2066.59 | -1.43 | 0.024073 |
| autocrine motility factor receptor                    | 267    | 3275.88  | 2855.25 | 2848.8   | 2357.65 | 1990.61 | 1894.75 | -1.44 | 0.010845 |
| kelch domain containing 4                             | 54758  | 432.06   | 358.77  | 357.36   | 270.97  | 287.9   | 233.41  | -1.44 | 0.025123 |
| clusterin                                             | 1191   | 540.33   | 468.32  | 460.02   | 304.47  | 316.75  | 389.97  | -1.45 | 0.018504 |
| gb:AV695800 /DB_XREF=gi:10297663 /DB_XREF=AV695800    |        | 727.27   | 658.43  | 690.14   | 454.87  | 465.97  | 498.63  | -1.45 | 0.002765 |
| Transcribed locus                                     |        | 371.01   | 384.39  | 427.34   | 242.98  | 270.1   | 299.84  | -1.45 | 0.018729 |
| EP400 N-terminal like                                 | 347918 | 495.46   | 523.86  | 567.47   | 294.31  | 401.76  | 394.28  | -1.45 | 0.03214  |
| capping protein (actin filament), gelsolin-like       | 822    | 2218.54  | 2346.14 | 2356.56  | 1595.86 | 1486.45 | 1603.21 | -1.47 | 0.000783 |
| erythrocyte membrane protein band 4.1 like            | 57669  | 535.09   | 474.62  | 498.64   | 359.38  | 349.14  | 326.53  | -1.47 | 0.004308 |
| TIP41, TOR signalling pathway regulator-like          | 261726 | 2059.23  | 2242.83 | 2349.21  | 1423.23 | 1667.52 | 1460.63 | -1.47 | 0.005872 |
| histone 1, H2bf                                       | 8343   | 1348.8   | 1368.98 | 1501.67  | 712.85  | 1069.42 | 1064.41 | -1.48 | 0.046056 |
| collagen, type IV, alpha 1                            | 1282   | 1141.61  | 1158.96 | 1299.84  | 614.07  | 931.36  | 873.7   | -1.49 | 0.041319 |
| son of sevenless homolog 1 (Drosophila)               | 6654   | 368.08   | 338.09  | 323.01   | 211.19  | 222.14  | 250.15  | -1.49 | 0.011969 |
| G protein-coupled receptor 68                         | 8111   | 1145.04  | 1182.88 | 1217.62  | 887.06  | 743.88  | 745.39  | -1.49 | 0.005015 |
| hypothetical protein FLJ20444                         | 403323 | 362.47   | 385.5   | 317.96   | 253.41  | 245.88  | 220.38  | -1.49 | 0.015638 |
| brain-derived neurotrophic factor                     | 627    | 548.73   | 472.96  | 536.6    | 308.8   | 378.7   | 357.6   | -1.49 | 0.007466 |
| zinc finger, MYM-type 6                               | 9204   | 1090.81  | 1431.72 | 1241.55  | 878.57  | 738.02  | 886.77  | -1.5  | 0.037908 |
| histone 1, H2be                                       | 8344   | 1383.26  | 1057.71 | 1093.35  | 645.86  | 845.01  | 841.98  | -1.51 | 0.03927  |
| hypothetical protein LOC339803                        | 339803 | 969.78   | 1316.29 | 1109.51  | 616.72  | 793.31  | 832.33  | -1.51 | 0.045696 |
| paired box gene 3 (Waardenburg syndrome)              | 5077   | 383.59   | 427.86  | 429.97   | 284.64  | 252.51  | 283.71  | -1.51 | 0.00507  |
| fibroblast growth factor 5                            | 2250   | 1601.82  | 1523.59 | 1445.02  | 852.83  | 1029.43 | 1121.04 | -1.52 | 0.009598 |
| DALR anticodon binding domain containing              | 55152  | 1107.23  | 1248.14 | 1207.82  | 842.17  | 768.36  | 744.56  | -1.52 | 0.004694 |
| CGI-96 protein                                        | 27341  | 2592.9   | 2600.89 | 2674.15  | 1575.57 | 1907.9  | 1704.7  | -1.52 | 0.007628 |
| polycystic kidney disease 1-like 2                    | 114780 | 333.3    | 288.2   | 263.73   | 200.07  | 186.23  | 194.37  | -1.52 | 0.026389 |
| chromosome 1 open reading frame 166                   | 79594  | 1087.85  | 1108.1  | 1042.2   | 758.41  | 680.2   | 687.7   | -1.53 | 0.000999 |
| Transcribed locus                                     |        | 303.99   | 294.77  | 284.58   | 181.19  | 195.65  | 198.34  | -1.53 | 0.002446 |
| methylthioadenosine phosphorylase                     | 4507   | 320.8    | 305.13  | 296.85   | 185.26  | 165.95  | 244.35  | -1.54 | 0.035708 |
| zinc finger, AN1-type domain 2A                       | 90637  | 2128.4   | 2373    | 2219.82  | 1310.86 | 1581.16 | 1487.84 | -1.54 | 0.002932 |
| pyruvate dehydrogenase phosphatase regul              | 55066  | 1245.97  | 1379.61 | 1488.49  | 847.63  | 940.41  | 873.47  | -1.55 | 0.012365 |
| epithelial membrane protein 2                         | 2013   | 3785.43  | 2966.3  | 2954.81  | 2173.31 | 1993.18 | 2093.75 | -1.55 | 0.047431 |
| importin 8                                            | 10526  | 4264.37  | 3698.23 | 4481.74  | 2383.22 | 2960.43 | 2709.52 | -1.55 | 0.008904 |
| D-2-hydroxyglutarate dehydrogenase /// sim 257054 /// | 653477 | 612.07   | 603.4   | 595.89   | 394.43  | 385.85  | 392.59  | -1.55 | 0.000367 |
| SEC22 vesicle trafficking protein homolog C           | 9117   | 1378.42  | 1468.8  | 1434.87  | 932.09  | 937.83  | 855.98  | -1.56 | 0.000502 |
| Poly(A) binding protein, cytoplasmic 1                | 26986  | 588.26   | 542.74  | 449.85   | 339.74  | 314.23  | 354.18  | -1.56 | 0.034559 |
| Homo sapiens, clone IMAGE:4863312, mRNA               |        | 281.54   | 374.68  | 337.17   | 201.03  | 216.15  | 218.26  | -1.56 | 0.043787 |
| nuclear factor, interleukin 3 regulated               | 4783   | 2082.16  | 2239.26 | 2190.24  | 1584.22 | 1175.19 | 1384.31 | -1.57 | 0.010363 |
| stanniocalcin 1                                       | 6781   | 589.23   | 661.47  | 699.27   | 382.88  | 419.37  | 438.04  | -1.57 | 0.00833  |
| acyltransferase like 1                                | 54947  | 267.73   | 357.4   | 295.35   | 184.93  | 177.69  | 218.84  | -1.57 | 0.047603 |
| Similar to SLIT-ROBO Rho GTPase-activati              | 653464 | 1394.47  | 1873.98 | 1788.41  | 933.73  | 1117.83 | 1157.07 | -1.58 | 0.040885 |
| Hypothetical protein similar to KIAA0187 gei          | 96610  | 757.62   | 756.3   | 867.58   | 426.43  | 524.53  | 548.25  | -1.58 | 0.007641 |
| gb:AI220472 /DB_XREF=gi:3802675 /DB_XREF=qg43e04.x1   |        | 849.71   | 702.03  | 728.3    | 409.71  | 522.53  | 505.05  | -1.58 | 0.010476 |
| CGI-96 protein                                        | 27341  | 787.71   | 739.93  | 719.93   | 447.75  | 465.38  | 482.21  | -1.6  | 0.001017 |
| secreted phosphoprotein 1 (osteopontin, boi           | 6696   | 1123.67  | 886.51  | 971.74   | 447.62  | 702.1   | 703.95  | -1.6  | 0.031505 |

|                                                       |        |          |          |          |         |         |         |       |          |
|-------------------------------------------------------|--------|----------|----------|----------|---------|---------|---------|-------|----------|
| cell division cycle associated 7 /// cell divisio     | 83879  | 2217.57  | 1678.59  | 1908.34  | 856.98  | 1492.79 | 1268.56 | -1.6  | 0.043287 |
| pyruvate dehydrogenase phosphatase regul              | 55066  | 1101.6   | 1168.83  | 1061.42  | 761.94  | 630.63  | 692.48  | -1.6  | 0.001767 |
| hypothetical protein LOC645644                        | 645644 | 369.55   | 462.15   | 411.56   | 229.71  | 242.41  | 305.74  | -1.6  | 0.015941 |
| Dedicator of cytokinesis 2                            | 1794   | 3009.65  | 3112.92  | 3775.93  | 1401.02 | 2428.51 | 2359.8  | -1.6  | 0.046461 |
| acid phosphatase 1, soluble                           | 52     | 2314.24  | 2225.94  | 2081.19  | 1408    | 1288.79 | 1417.58 | -1.61 | 0.001189 |
| aryl hydrocarbon receptor                             | 196    | 3685.39  | 3674.68  | 3722.48  | 2777.01 | 2031.88 | 2085.55 | -1.61 | 0.024601 |
| stanniocalcin 1                                       | 6781   | 899.06   | 751.31   | 943.96   | 493.71  | 593.87  | 526.68  | -1.61 | 0.015616 |
| microfibrillar associated protein 5                   | 8076   | 804.64   | 1052.08  | 1119     | 450.8   | 720.79  | 674.67  | -1.61 | 0.046866 |
| methylthioadenosine phosphorylase                     | 4507   | 606.71   | 512.39   | 516.9    | 309.92  | 316.69  | 387.4   | -1.61 | 0.009414 |
| guanylate binding protein 3                           | 2635   | 2169.24  | 2503.5   | 2492.68  | 1459.7  | 1468.57 | 1533.06 | -1.61 | 0.011461 |
| microfibrillar associated protein 5                   | 8076   | 2881.43  | 3029.48  | 2978.5   | 1562.5  | 1984.95 | 1951.21 | -1.62 | 0.008784 |
| chromosome 20 open reading frame 100                  | 84969  | 1558.42  | 1193.29  | 1329.19  | 818.7   | 860.84  | 815.29  | -1.63 | 0.034019 |
| hypothetical protein LOC647322                        | 647322 | 395.03   | 489.63   | 438.47   | 247.47  | 286.43  | 271.23  | -1.63 | 0.018959 |
| clusterin associated protein 1                        | 23059  | 432.58   | 469.93   | 498.31   | 256.65  | 305.14  | 294.84  | -1.64 | 0.004276 |
| epithelial membrane protein 2                         | 2013   | 1782.69  | 1422.05  | 1485.45  | 1031.23 | 942.82  | 910.47  | -1.64 | 0.023855 |
| CDNA FLJ30156 fis. clone BRACE2000487                 |        | 605.76   | 548.36   | 511.93   | 351.79  | 329.46  | 335.71  | -1.64 | 0.00993  |
| anthrax toxin receptor 1                              | 84168  | 531.95   | 544.88   | 540.58   | 401.25  | 304.18  | 277.12  | -1.65 | 0.023701 |
| serine incorporator 2                                 | 347735 | 1847.88  | 1505.18  | 1574.67  | 1035.34 | 969.54  | 969.8   | -1.66 | 0.018161 |
| chromosome 6 open reading frame 139                   | 55166  | 1258.18  | 1119.91  | 1184.15  | 490.72  | 821.49  | 814.02  | -1.67 | 0.037056 |
| Peroxisomal LON protease like                         | 83752  | 278.33   | 381.58   | 374.66   | 197.14  | 199.51  | 228.31  | -1.67 | 0.042224 |
| phenylalanine-tRNA synthetase-like, beta su           | 10056  | 395.2    | 401.5    | 401.85   | 217.24  | 248.19  | 249.65  | -1.68 | 0.0009   |
| hypothetical protein MGC3207                          | 84245  | 1501.81  | 1886.6   | 1835.07  | 962.88  | 1038.42 | 1090.92 | -1.69 | 0.020811 |
| suprabasin                                            | 374897 | 457.12   | 521.15   | 469.29   | 368.51  | 231.56  | 259.1   | -1.69 | 0.024455 |
| microfibrillar associated protein 5                   | 8076   | 1150.71  | 1355.29  | 1479.37  | 619.81  | 864.45  | 859.23  | -1.7  | 0.014486 |
| tetraspanin 18                                        | 90139  | 210.17   | 286.44   | 264.94   | 170.47  | 149.03  | 135.48  | -1.7  | 0.033493 |
| major histocompatibility complex, class I, F          | 3134   | 1151.2   | 1237.52  | 1070.75  | 795.6   | 577.33  | 644.77  | -1.71 | 0.008873 |
| gb:BE271180 /DB_XREF=gi:9144831 /DB_XREF=600943914f   |        | 441.67   | 382.96   | 444.56   | 232.35  | 264.7   | 236.79  | -1.71 | 0.007044 |
| coagulation factor X                                  | 2159   | 273.2    | 345.05   | 326.91   | 240.63  | 155.52  | 151.76  | -1.72 | 0.026438 |
| pleckstrin homology domain containing, fam            | 26030  | 510.55   | 393.98   | 428.95   | 237.19  | 271.36  | 252.08  | -1.73 | 0.017772 |
| lumican                                               | 4060   | 6695.33  | 7640.2   | 6828.04  | 4389.49 | 3611.99 | 4200.8  | -1.74 | 0.003379 |
| coagulation factor II (thrombin) receptor             | 2149   | 1245.5   | 1298.14  | 1475.2   | 629.64  | 794.48  | 867.5   | -1.74 | 0.006165 |
| CDNA clone IMAGE:5261717                              |        | 259.62   | 254.31   | 211.9    | 148.3   | 118.05  | 152.16  | -1.74 | 0.008351 |
| ras-related C3 botulinum toxin substrate 2 (r         | 5880   | 1400.15  | 1851.92  | 1917.44  | 674.37  | 1163.87 | 1109.14 | -1.75 | 0.033652 |
| hypothetical LOC388610                                | 388610 | 10223.63 | 13885.63 | 13466.16 | 4557.12 | 7814.81 | 9096.74 | -1.75 | 0.043567 |
| hypothetical protein LOC150837                        | 150837 | 542.75   | 689.36   | 715.36   | 394.89  | 341.16  | 379.09  | -1.75 | 0.025686 |
| gb:AI763262 /DB_XREF=gi:5178929 /DB_XREF=wi66c04.x1 / |        | 554.84   | 502.43   | 544.84   | 287.24  | 312.74  | 315.03  | -1.75 | 0.000831 |
| KIAA0265 protein                                      | 23008  | 1019.7   | 1097.7   | 1063.75  | 672.87  | 572.25  | 550.71  | -1.76 | 0.007915 |
| Serine hydrolase-like 2                               | 253190 | 428.47   | 371.62   | 362.86   | 173.95  | 255.42  | 222.14  | -1.77 | 0.008878 |
| collagen, type XVIII, alpha 1                         | 80781  | 1466.19  | 1893.84  | 1815.74  | 861.46  | 974.32  | 1066.16 | -1.78 | 0.017281 |
| major histocompatibility complex, class II, Df        | 3115   | 1077.6   | 1074.49  | 1152.12  | 569.65  | 632.59  | 643.89  | -1.79 | 0.019474 |
| hypothetical protein MGC9913                          | 386759 | 990      | 1053.27  | 959.17   | 604.39  | 554.31  | 528.22  | -1.79 | 0.000804 |
| gb:AI797678 /DB_XREF=gi:5363150 /DB_XREF=we90c08.x1   |        | 757.37   | 613.05   | 575.24   | 284.53  | 396.03  | 395.85  | -1.8  | 0.016638 |
| trafficking protein particle complex 4                | 51399  | 6080.79  | 6361.38  | 6052.05  | 3051.72 | 3708.18 | 3428.41 | -1.81 | 0.000705 |
| nuclear RNA export factor 3                           | 56000  | 289.89   | 321.79   | 400.19   | 146.96  | 214.67  | 197.05  | -1.81 | 0.025215 |
| leucine rich repeat containing 2                      | 79442  | 430.41   | 545.19   | 536.94   | 242.65  | 286.42  | 306.65  | -1.81 | 0.013695 |
| T-box 1                                               | 6899   | 1799.91  | 1452.6   | 1644.22  | 1024.71 | 811.72  | 842.74  | -1.83 | 0.00541  |
| uveal autoantigen with coiled-coil domains a          | 55075  | 248.02   | 267.85   | 309.88   | 128.18  | 170.87  | 151.07  | -1.83 | 0.009938 |



|                                                                |        |          |          |          |         |         |         |       |          |
|----------------------------------------------------------------|--------|----------|----------|----------|---------|---------|---------|-------|----------|
| Homo sapiens, clone IMAGE:5019307, mRNA                        |        | 456.26   | 545.16   | 520.57   | 251.69  | 283.42  | 293.82  | -1.83 | 0.005761 |
| insulin-like growth factor 1 receptor                          | 3480   | 976.52   | 1218.91  | 957.26   | 736.31  | 374.92  | 606.26  | -1.84 | 0.025977 |
| Chromosome X open reading frame 33                             | 139322 | 251.08   | 310.28   | 348.42   | 141.02  | 176.08  | 174.41  | -1.85 | 0.028871 |
| Hypothetical gene supported by BC041875;                       | 400642 | 369.91   | 331.35   | 286.04   | 193.32  | 164.47  | 171.64  | -1.86 | 0.013096 |
| kelch-like 18 (Drosophila)                                     | 23276  | 238.39   | 281.11   | 263.61   | 123.13  | 148.08  | 149.44  | -1.86 | 0.003901 |
| nerve growth factor, beta polypeptide                          | 4803   | 338.61   | 430.15   | 401.62   | 189.17  | 231.68  | 202.79  | -1.87 | 0.011191 |
| hypothetical gene supported by AK128660                        | 400566 | 541.31   | 490.56   | 503.39   | 242.82  | 285.75  | 282.58  | -1.87 | 0.0012   |
| glucuronidase, beta-like 2                                     | 375513 | 262.01   | 252.39   | 260.89   | 141.52  | 139.29  | 135.25  | -1.87 | 0.003328 |
| trafficking protein particle complex 4                         | 51399  | 5170.66  | 5763.1   | 5677.11  | 2836.78 | 2969.6  | 3050.96 | -1.88 | 0.00274  |
| major histocompatibility complex, class I, C                   | 3107   | 7451.37  | 6708.48  | 6588.17  | 4705.09 | 3188    | 3189.63 | -1.89 | 0.011622 |
| sperm equatorial segment protein 1                             | 246777 | 591.31   | 602.45   | 607.24   | 340.57  | 310.99  | 307.7   | -1.89 | 0.000113 |
| serine palmitoyltransferase, long chain base                   | 10558  | 448.7    | 567.43   | 536.4    | 216.9   | 302.36  | 300.33  | -1.89 | 0.008824 |
| cyclin-dependent kinase 6                                      | 1021   | 1962.45  | 2500.25  | 2121.13  | 1085.57 | 1011.37 | 1402.04 | -1.9  | 0.009941 |
| phosphatase and actin regulator 3                              | 116154 | 443.32   | 352.97   | 376.71   | 289.51  | 145.52  | 171.27  | -1.93 | 0.030429 |
| tumor necrosis factor receptor superfamily, r                  | 8797   | 348.3    | 296.42   | 255.69   | 177.78  | 138.14  | 150.85  | -1.93 | 0.018646 |
| HRAS-like suppressor 3                                         | 11145  | 485.14   | 610.8    | 637.19   | 252.95  | 322.66  | 309.6   | -1.94 | 0.014167 |
| leucine rich repeat containing 15                              | 131578 | 12309.32 | 12922.81 | 14282.51 | 5312.95 | 7788.05 | 7086.86 | -1.96 | 0.003584 |
| gb:AA021163 /DB_XREF=gi:1484898 /DB_XREF=ze65e10.s1            |        | 415.42   | 378.58   | 352.56   | 198.27  | 182.47  | 193.69  | -1.96 | 0.003682 |
| chromosome 21 open reading frame 7                             | 56911  | 1573.98  | 1242.29  | 1215.28  | 614.82  | 759.13  | 661.2   | -1.98 | 0.017805 |
| neurobeachin                                                   | 26960  | 526.85   | 631.39   | 632.44   | 253.27  | 315.08  | 336.23  | -1.99 | 0.005346 |
| amyloid beta (A4) precursor protein-binding, Transcribed locus | 54518  | 1504.01  | 1248.33  | 1464.22  | 624.05  | 747.85  | 733.5   | -2    | 0.003838 |
| thioredoxin interacting protein                                | 10628  | 218.09   | 324.05   | 307.8    | 123.83  | 148.86  | 150.31  | -2.01 | 0.040761 |
| neurobeachin                                                   | 26960  | 983.04   | 878.61   | 847.9    | 527.92  | 418.8   | 389.62  | -2.03 | 0.002182 |
| gb:BF063164 /DB_XREF=gi:10822074 /DB_XREF=7h84e05.x            |        | 256.36   | 317.19   | 317.91   | 120.65  | 139.91  | 179.63  | -2.03 | 0.008345 |
| Splicing factor, arginine/serine-rich 3                        | 6428   | 255.78   | 319.43   | 372.39   | 83.46   | 186.4   | 188.79  | -2.09 | 0.034815 |
| creatine kinase, brain                                         | 1152   | 279      | 367.49   | 322.46   | 147.45  | 172.23  | 142.13  | -2.1  | 0.015386 |
| early growth response 1                                        | 1958   | 1212.08  | 963      | 1010.3   | 647.4   | 404.32  | 451.53  | -2.12 | 0.006349 |
| KIAA1913                                                       | 114801 | 1493.35  | 1520.77  | 1458.22  | 714.3   | 629.91  | 749.05  | -2.14 | 0.000165 |
| ets variant gene 1                                             | 2115   | 4032.21  | 3255.01  | 4139.88  | 1730.11 | 1947.48 | 1646.52 | -2.14 | 0.011555 |
| UDP-Gal:betaGlcNAc beta 1,4- galactosyltr                      | 9334   | 980.56   | 765.6    | 797.27   | 395.51  | 387.79  | 396.67  | -2.15 | 0.018261 |
| hypothetical protein LOC255480                                 | 255480 | 2748.4   | 3061.32  | 2862.93  | 1469.69 | 1126.38 | 1405.51 | -2.17 | 0.000512 |
| thioredoxin interacting protein                                | 10628  | 1284.98  | 1000.8   | 1110.29  | 534.74  | 482.09  | 481.76  | -2.25 | 0.011836 |
| heart and neural crest derivatives expressec                   | 9464   | 382.75   | 350.08   | 277.35   | 181.06  | 111.92  | 150.62  | -2.26 | 0.012943 |
| Transcribed locus                                              |        | 359.79   | 296.08   | 328.66   | 171.37  | 134.83  | 120.99  | -2.28 | 0.002429 |
| hypothetical protein MGC9913                                   | 386759 | 369.21   | 376.15   | 372.31   | 139.01  | 153.44  | 184.11  | -2.33 | 0.003697 |
| complement factor D (adipsin)                                  | 1675   | 1219.23  | 1404.42  | 1360.81  | 738.63  | 469.09  | 526.65  | -2.33 | 0.003279 |
| collagen, type XV, alpha 1                                     | 1306   | 445.21   | 445.21   | 393.43   | 277.95  | 137.69  | 124.14  | -2.35 | 0.021805 |
| opioid growth factor receptor                                  | 11054  | 419.74   | 632.55   | 632.61   | 278.63  | 218.08  | 212.82  | -2.37 | 0.037245 |
| beta 1,3-galactosyltransferase-like                            | 145173 | 486.03   | 475.73   | 488.62   | 232.38  | 177.17  | 196.5   | -2.38 | 0.001628 |
| SEC31-like 1 (S. cerevisiae)                                   | 22872  | 1155.78  | 1122.01  | 1085.66  | 521.35  | 457.41  | 438.55  | -2.38 | 0.000152 |
| nicotinate phosphoribosyltransferase domai                     | 93100  | 1382.56  | 1345.35  | 1343.18  | 562.69  | 543.45  | 569.58  | -2.43 | 0.000021 |
| leucine rich repeat containing 2                               | 79442  | 483.65   | 664.73   | 634.31   | 233.99  | 259.91  | 236.24  | -2.44 | 0.01541  |
| prostaglandin E receptor 2 (subtype EP2), 5                    | 5732   | 495.66   | 519.11   | 605.29   | 182.31  | 252.52  | 217.56  | -2.48 | 0.002459 |
| hypothetical protein LOC255480                                 | 255480 | 326.89   | 491.07   | 520.42   | 139.37  | 189.51  | 205.94  | -2.5  | 0.037269 |
| Forkhead box C2 (MFH-1, mesenchyme forl                        | 2303   | 1092.41  | 874.18   | 915.53   | 422.39  | 350.79  | 352.09  | -2.57 | 0.006617 |
| T-box 5                                                        | 6910   | 288.14   | 346.56   | 408.48   | 89.72   | 153.87  | 134.12  | -2.71 | 0.011195 |
|                                                                |        | 1562.87  | 1449.41  | 1516.98  | 495.55  | 574.48  | 577.43  | -2.74 | 0.000051 |

|                                                            |        |         |         |         |         |         |         |        |          |
|------------------------------------------------------------|--------|---------|---------|---------|---------|---------|---------|--------|----------|
| mesoderm specific transcript homolog (mou                  | 4232   | 297.37  | 416.5   | 443.21  | 99.17   | 162.11  | 154.91  | -2.76  | 0.018132 |
| calponin 1, basic, smooth muscle                           | 1264   | 1319.26 | 1634.92 | 1694.79 | 448.53  | 672.72  | 547.73  | -2.77  | 0.004264 |
| zona pellucida glycoprotein 3 (sperm recept 22932 /// 7784 |        | 741.99  | 732.21  | 721.64  | 246.02  | 273.51  | 247.84  | -2.86  | 0.000122 |
| arylsulfatase A                                            | 410    | 370.4   | 351.75  | 383.83  | 143.37  | 127.65  | 117.01  | -2.87  | 0.000225 |
| Similar to TFIIH basal transcription factor co             | 653249 | 145.54  | 142.08  | 181.96  | 39.43   | 61.39   | 56.81   | -2.95  | 0.005024 |
| chromosome 8 open reading frame 59                         | 401466 | 2427.8  | 2279.78 | 2187.22 | 755.36  | 796.81  | 762.47  | -2.97  | 0.000919 |
| hypothetical protein MGC24665                              | 116028 | 1684.63 | 1417.37 | 1488.88 | 419.49  | 562.15  | 533.28  | -3.01  | 0.001232 |
| major histocompatibility complex, class II, D              | 3112   | 324.34  | 395.51  | 369.02  | 105.64  | 133.86  | 112.86  | -3.04  | 0.001405 |
| T-box 5                                                    | 6910   | 457.94  | 403.68  | 328.68  | 136.88  | 101.35  | 152.77  | -3.04  | 0.008743 |
| heat shock 70kDa protein 2                                 | 3306   | 6200.85 | 5558.91 | 5755.69 | 2558.2  | 1496.54 | 1673.56 | -3.06  | 0.001294 |
| transmembrane 4 L six family member 1                      | 4071   | 963.71  | 911.34  | 892.44  | 244.5   | 333.33  | 325.48  | -3.07  | 0.000147 |
| transmembrane 4 L six family member 1                      | 4071   | 542.85  | 511.07  | 482.14  | 135.84  | 186.41  | 171.52  | -3.09  | 0.000542 |
| zona pellucida glycoprotein 3 (sperm recept 22932 /// 7784 |        | 594.98  | 619.24  | 576.9   | 167.44  | 208.01  | 202.61  | -3.09  | 0.000091 |
| cytochrome P450, family 1, subfamily B, pol                | 1545   | 4093.43 | 5983.25 | 5005.91 | 2499.62 | 761.03  | 1564.94 | -3.13  | 0.010402 |
| NK3 transcription factor related, locus 1 (Drc             | 4824   | 2366.21 | 1957.38 | 2332.42 | 584.81  | 737.92  | 740.59  | -3.23  | 0.002723 |
| KIAA0265 protein                                           | 23008  | 1053.98 | 1097.45 | 1116.46 | 385.18  | 286.88  | 332.61  | -3.25  | 0.000052 |
| insulin-like growth factor binding protein 5               | 3488   | 1485.78 | 1256.44 | 1335.43 | 227.49  | 507.02  | 507.78  | -3.28  | 0.002011 |
| CDNA FLJ36559 fis. clone TRACH2009291                      |        | 186.29  | 205.99  | 257.97  | 30.57   | 76.75   | 92.46   | -3.28  | 0.007446 |
| hypothetical LOC388796                                     | 388796 | 3513.11 | 3377.2  | 3270.31 | 893.16  | 1121.27 | 1058.36 | -3.3   | 0.000028 |
| cytochrome P450, family 1, subfamily B, pol                | 1545   | 2133.54 | 4067    | 3657.46 | 1389.32 | 616.17  | 974.94  | -3.33  | 0.046995 |
| cytochrome P450, family 1, subfamily B, pol                | 1545   | 4376.66 | 6604.46 | 5594.4  | 2504.56 | 878.19  | 1580.09 | -3.35  | 0.011019 |
| transmembrane 4 L six family member 1                      | 4071   | 371.88  | 327.69  | 312.81  | 75.87   | 111.95  | 106.02  | -3.42  | 0.000821 |
| G0/G1switch 2                                              | 50486  | 880.27  | 1019.64 | 1104.75 | 212.94  | 324.55  | 329.98  | -3.43  | 0.002007 |
| integrin, beta 8                                           | 3696   | 127.15  | 203.14  | 208.16  | 50.31   | 48.77   | 54.99   | -3.52  | 0.037238 |
| Growth hormone regulated TBC protein 1                     | 79774  | 372.63  | 287.14  | 298.48  | 117.78  | 78.48   | 75.41   | -3.52  | 0.004106 |
| MAM domain containing 2                                    | 256691 | 168.73  | 266.32  | 287.33  | 64.17   | 75.75   | 54.63   | -3.74  | 0.037063 |
| hypothetical LOC388796                                     | 388796 | 1740.78 | 1929.98 | 1832.7  | 420.21  | 479.34  | 479.76  | -3.96  | 0.000261 |
| Protein kinase, cAMP-dependent, regulatory                 | 5575   | 303.4   | 358.05  | 339.81  | 93.25   | 79.04   | 80.84   | -3.99  | 0.000708 |
| solute carrier family 35, member E2                        | 9906   | 101.82  | 169.08  | 137.86  | 30.89   | 33.44   | 35.14   | -4.12  | 0.02924  |
| fibrillin 2 (congenital contractural arachnoda             | 2201   | 1580.95 | 1442.52 | 1481.89 | 453.35  | 285.91  | 302.76  | -4.3   | 0.000096 |
| cartilage oligomeric matrix protein                        | 1311   | 1285.1  | 1816.53 | 1866.56 | 509.64  | 324.96  | 321.94  | -4.34  | 0.01524  |
| secreted frizzled-related protein 2                        | 6423   | 1288.19 | 1198.72 | 1190.92 | 277.91  | 274.62  | 294.9   | -4.34  | 0.000197 |
| phosphodiesterase 4D interacting protein (n                | 9659   | 1769.59 | 1425.28 | 1494.07 | 430.85  | 349.22  | 315.21  | -4.37  | 0.001175 |
| secreted frizzled-related protein 2                        | 6423   | 2360.85 | 4104.22 | 3977.92 | 583.18  | 481.47  | 589.53  | -6.32  | 0.034852 |
| latexin                                                    | 56925  | 707.22  | 934.67  | 926.52  | 123.87  | 125.13  | 146.1   | -6.51  | 0.008643 |
| mab-21-like 1 (C. elegans)                                 | 4081   | 1667.54 | 1795.89 | 1851.71 | 176.01  | 189.44  | 158     | -10.14 | 0.000945 |
